# Supplementary material
Source: PubMed Central journal article supplement (PMC5700350)
Supplement: AAC.01763-17_zac012176743s1.pdf [file AAC.01763-17_zac012176743s1.pdf]

# Appendix. Supplementary Materials

## SUPPLEMENTARY TABLES

**Table S1. CD4/CD8 normalization at cutoff >0.4: Efavirenz vs Maraviroc b.i.d.**

| N=519                                                                                          | Hazard Ratio<br>(SE) | CI 95%     | P value |
|------------------------------------------------------------------------------------------------|----------------------|------------|---------|
| <b>Model 1. Cox PH Crude model</b>                                                             |                      |            |         |
| Treatment arm (efavirenz vs. maraviroc)                                                        | 1.25 (0.12)          | 1.04; 1.55 | 0.020   |
| <b>Model 2. Adjusted for age, sex, baseline CD4 counts, baseline CD8 counts and HCV status</b> |                      |            |         |
| Treatment arm (efavirenz vs. maraviroc)                                                        | 1.30 (0.13)          | 1.07; 1.58 | 0.007   |

*Abbreviations: SE, standard error; CI, confidence interval*

**Table S2. CD4/CD8 normalization at cutoff >1: Efavirenz vs Maraviroc b.i.d.**

| <b>N=519</b>                                                                                   | <b>Hazard Ratio<br/>(SE)</b> | <b>CI 95%</b> | <b>P value</b> |
|------------------------------------------------------------------------------------------------|------------------------------|---------------|----------------|
| <b>Model 1. Cox PH Crude model</b>                                                             |                              |               |                |
| Treatment arm (efavirenz vs. maraviroc)                                                        | 1.42 (0.20)                  | 1.09; 1.87    | 0.010          |
| <b>Model 2. Adjusted for age, sex, baseline CD4 counts, baseline CD8 counts and HCV status</b> |                              |               |                |
| Treatment arm (efavirenz vs. maraviroc)                                                        | 1.43 (0.20)                  | 1.10; 1.88    | 0.009          |

*Abbreviations: SE, standard error; CI, confidence interval*

**Table S3. Longitudinal trajectory of CD4/CD8 ratio per treatment group (generalized estimating equation)**

|                              | <b>Coefficient</b> | <b>Standard Error</b> | <b>P value</b> |
|------------------------------|--------------------|-----------------------|----------------|
| <b>Intercept</b>             | -0.3479            | 0.000                 | <0.001         |
| <b>Duration (weeks)</b>      | -0.0003            | 0.000                 | <0.001         |
| <b>Treatment (maraviroc)</b> | -0.013             | 0.006                 | 0.034          |
| <b>CD4+ T cell count</b>     | 0.0007             | 0.001                 | <0.001         |
| <b>CD8+ T cell count</b>     | -0.0003            | 0.001                 | <0.001         |
